# Supplementary material
Source: publisher figshare collection journal article supplement (https://future-science-group.figshare.com/articles/dataset/_/21378144)
Supplement: Supplementary file 1 [file 1]

## Sheet: Table S3
Supplementary Table 3. Association results of 90 SNPs which showed smaller P values in combined analysis than those in GWAS.
Chromosomal region	Positiona	SNP	Gene	Allele (1/2)b	Risk allele	Stage	Case						Control						P value			Odds ratio (95% CI)c
							Genotype				RAF		Genotype				RAF		Allelic	Dominant	Recessive
							11	12	22				11	12	22
21q21.3	27608265	rs469490	Intergenic	G/A	A	GWAS	229	81	5		0.144444		80	6	0		0.0348837		3.05363e-05	2.18751e-05	0.58927	4.67 (2.01-13.28)
						Replication	142	56	7		0.170732		15	1	0		0.03125		0.042634	0.0439183	1	6.37 (1.02-263.52)
						Combined	371	137	12		0.154808		95	7	0		0.0343137		2.96786e-07	6.35349e-07	0.231628	5.15 (2.39-13.22)
17p12	13892591	rs971030	Intergenic	T/C	T	GWAS	114	154	47		0.606349		12	47	27		0.412791		8.52703e-06	0.00089663	4.40632e-05	2.19 (1.53-3.14)
						Replication	63	104	38		0.560976		1	9	6		0.34375		0.0256676	0.097375	0.0439183	2.43 (1.09-5.75)
						Combined	177	258	85		0.588462		13	56	33		0.401961		1.07572e-06	0.000460478	1.02739e-05	2.13 (1.55-2.93)
13q32.3	100976562	rs16957301	PCCA LOC107984575	T/C	C	GWAS	221	81	13		0.169841		77	9	0		0.0523256		4.21465e-05	0.000149	0.0796954	3.70 (1.82-8.50)
						Replication	148	52	5		0.15122		16	0	0		0		0.014	0.014	1	Inf (1.41-Inf)
						Combined	369	133	18		0.1625		93	9	0		0.0441176		1.72e-06	5.91e-06	0.0553	4.20 (2.11-9.51)
3q13.32	117640199	rs6805565	LOC107986022	C/A	C	GWAS	111	142	61		0.58		10	51	24		0.42		0.00018549	0.0996336	1.54877e-05	4.09 (2.00-9.24)
						Replication	72	91	42		0.57		3	11	2		0.53		0.712068	0.744606	0.273359	2.34 (0.61-13.21)
						Combined	183	233	103		0.58		13	62	26		0.44		0.000265164	0.182503	3.79064e-06	3.68 (1.98-7.39)
10p11.23	30186233	rs1929254	Intergenic	C/T	C	GWAS	270	43	2		0.925397		61	21	4		0.831395		0.000585841	0.0209	0.0022223	2.51 (1.47-4.24)
						Replication	174	29	2		0.919512		9	6	1		0.75		0.00541	0.203	0.00911	3.79 (1.36-9.62)
						Combined	444	72	4		0.923077		70	27	5		0.818627		1.77e-05	0.00786	0.000153	2.66 (1.69-4.12)
8p21.3	19463823	rs4472533	CSGALNACT1	G/A	A	GWAS	170	128	17		0.257143		65	18	2		0.129412		0.000307667	0.000176666	0.387757	2.77 (1.57-5.06)
						Replication	125	69	11		0.221951		15	1	0		0.03125		0.00625405	0.00690483	1	9.54 (1.41-408.37)
						Combined	295	197	28		0.243269		80	19	2		0.113861		2.72735e-05	1.95546e-05	0.203733	2.90 (1.71-5.10)
5p15.1	17200074	rs11952802	BASP1-AS1	G/A	A	GWAS	167	117	31		0.284127		62	22	2		0.151163		0.000355363	0.00200245	0.0252091	2.23 (1.40-3.65)
						Replication	112	79	14		0.260976		14	2	0		0.0625		0.00978653	0.0157585	0.606059	5.28 (1.30-46.39)
						Combined	279	196	45		0.275		76	24	2		0.137255		2.02436e-05	0.000112785	0.0140076	2.38 (1.55-3.78)
22q13.1	40718100	rs4821942	TNRC6B	G/A	G	GWAS	148	134	33		0.68		23	50	13		0.56		0.00278817	0.252404	0.000841995	2.42 (1.40-4.31)
						Replication	105	81	19		0.71		4	10	2		0.56		0.10759	0.653805	0.0667193	3.13 (0.91-13.78)
						Combined	253	215	52		0.69		27	60	15		0.56		0.000239925	0.164152	3.19838e-05	2.63 (1.61-4.39)
1p34.2	43708658	rs1760668	CFAP57 LOC105378685	G/A	G	GWAS	209	100	6		0.82		53	23	10		0.75		0.0384141	0.000333301	0.44401	6.73 (2.14-23.28)
						Replication	139	62	4		0.83		9	5	2		0.72		0.146897	0.0622433	0.409533	7.05 (0.59-54.27)
						Combined	348	162	10		0.83		62	28	12		0.75		0.0105837	3.2001e-05	0.253628	6.77 (2.59-18.05)
19p13.3	6658636	rs344569	Intergenic	G/A	G	GWAS	122	141	52		0.611111		17	45	24		0.459302		0.000471697	0.0202	0.000877014	1.85 (1.30-2.64)
						Replication	68	103	34		0.582927		2	7	7		0.34375		0.00968	0.0143	0.101	2.66 (1.19-6.29)
						Combined	190	244	86		0.6		19	52	31		0.441176		3.75e-05	0.00207	0.000355	1.90 (1.39-2.60)
17p12	13303083	rs1029674	Intergenic	C/T	T	GWAS	116	146	53		0.4		48	31	6		0.252941		0.000452922	0.00124587	0.0246525	1.97 (1.33-2.95)
						Replication	66	93	46		0.45122		6	9	1		0.34375		0.271181	0.78252	0.203108	1.57 (0.70-3.70)
						Combined	182	239	99		0.420192		54	40	7		0.267327		4.05153e-05	0.000718542	0.00219505	1.99 (1.41-2.83)
3q13.32	117731061	rs10511373	Intergenic	C/A	C	GWAS	106	144	65		0.57		11	48	27		0.41		0.000281339	0.0426781	9.28417e-05	3.45 (1.73-7.52)
						Replication	68	92	45		0.56		3	11	2		0.53		0.85428	0.532356	0.279764	2.14 (0.56-12.12)
						Combined	174	236	110		0.56		14	59	29		0.43		0.000524991	0.118816	4.96213e-05	3.16 (1.72-6.19)
17q22	55274630	rs7212872	Intergenic	T/C	C	GWAS	177	114	21		0.25		64	22	0		0.127907		0.000599	0.00281	0.011	2.27 (1.39-3.87)
						Replication	117	76	12		0.243902		13	3	0		0.09375		0.053	0.068	1	3.11 (0.93-16.30)
						Combined	294	190	33		0.247582		77	25	0		0.122549		5.21e-05	0.000388	0.00322	2.35 (1.50-3.83)
3q28	189061076	rs13067334	Intergenic	A/G	G	GWAS	154	142	18		0.283439		60	24	2		0.162791		0.00113	0.00063	0.269	2.39 (1.40-4.17)
						Replication	105	91	9		0.265854		13	3	0		0.09375		0.0337	0.0344	1	4.10 (1.08-23.11)
						Combined	259	233	27		0.276493		73	27	2		0.151961		0.000148	5.43e-05	0.203	2.52 (1.56-4.17)
16q22.2	72527247	rs212175	LINC01572	C/T	T	GWAS	146	137	32		0.319048		43	43	0		0.25		0.0922774	0.626097	0.000484105	Inf (2.42-Inf)
						Replication	101	83	21		0.304878		12	4	0		0.125		0.0414305	0.067474	0.374616	Inf (0.40-Inf)
						Combined	247	220	53		0.313462		55	47	0		0.230392		0.0191574	0.278605	6.50926e-05	Inf (2.96-Inf)
1p35.2	31151500	rs1188390	Intergenic	C/T	T	GWAS	196	108	11		0.206349		71	14	1		0.0930233		0.000494677	0.000291019	0.474578	2.53 (1.45-4.71)
						Replication	111	82	12		0.258537		10	6	0		0.1875		0.526503	0.607548	1	1.51 (0.59-4.61)
						Combined	307	190	23		0.226923		81	20	1		0.107843		6.56784e-05	8.07272e-05	0.154553	2.43 (1.51-4.06)
17q25.1	72517043	rs884802	Intergenic	T/C	C	GWAS	155	140	20		0.285714		62	22	2		0.151163		0.000254144	0.000148156	0.186687	2.24 (1.41-3.68)
						Replication	99	81	25		0.319512		9	6	1		0.25		0.553519	0.609424	0.700555	1.41 (0.59-3.72)
						Combined	254	221	45		0.299038		71	28	3		0.166667		7.70848e-05	0.000133726	0.0647558	2.13 (1.43-3.26)
17q25.1	72523224	rs10512596	CD300LB	T/C	C	GWAS	156	139	20		0.284127		62	22	2		0.151163		0.000355363	0.000223855	0.186687	2.23 (1.40-3.65)
						Replication	98	81	25		0.321078		9	6	1		0.25		0.553781	0.608257	0.70036	1.42 (0.60-3.75)
						Combined	254	220	45		0.298651		71	28	3		0.166667		7.72486e-05	0.00013558	0.0648698	2.13 (1.43-3.25)
17q25.1	72533076	rs11652446	CD300C LOC107985074	C/A	A	GWAS	156	139	20		0.284127		62	22	2		0.151163		0.000355363	0.000223855	0.186687	2.23 (1.40-3.65)
						Replication	99	81	25		0.319512		9	6	1		0.25		0.553519	0.609424	0.700555	1.41 (0.59-3.72)
						Combined	255	220	45		0.298077		71	28	3		0.166667		7.81689e-05	0.000138508	0.0647558	2.12 (1.42-3.24)
17q25.1	72532378	rs4789073	CD300C LOC107985074	C/T	T	GWAS	156	139	20		0.284127		62	22	2		0.151163		0.000355363	0.000223855	0.186687	2.23 (1.40-3.65)
						Replication	99	81	25		0.319512		9	6	1		0.25		0.553519	0.609424	0.700555	1.41 (0.59-3.72)
						Combined	255	220	45		0.298077		71	28	3		0.166667		7.81689e-05	0.000138508	0.0647558	2.12 (1.42-3.24)
17q25.1	72532409	rs4789074	CD300C LOC107985074	A/G	G	GWAS	156	139	20		0.284127		62	22	2		0.151163		0.000355363	0.000223855	0.186687	2.23 (1.40-3.65)
						Replication	99	81	25		0.319512		9	6	1		0.25		0.553519	0.609424	0.700555	1.41 (0.59-3.72)
						Combined	255	220	45		0.298077		71	28	3		0.166667		7.81689e-05	0.000138508	0.0647558	2.12 (1.42-3.24)
18p11.31	5188604	rs11081175	AKAIN1	C/T	C	GWAS	188	118	9		0.78		48	26	12		0.71		0.0419526	0.000256697	0.538108	5.48 (2.03-15.33)
						Replication	117	83	5		0.77		11	4	1		0.81		0.825697	0.366381	0.43757	2.65 (0.05-26.03)
						Combined	305	201	14		0.78		59	30	13		0.73		0.100887	8.1739e-05	0.912669	5.26 (2.20-12.52)
5q23.3	129018092	rs30642	ADAMTS19	T/C	C	GWAS	127	140	48		0.37		39	45	2		0.28		0.0310765	0.458827	0.000677542	7.53 (1.90-65.35)
						Replication	82	84	39		0.4		6	9	1		0.34		0.707415	1	0.315683	3.51 (0.51-152.02)
						Combined	209	224	87		0.38		45	54	3		0.29		0.0172075	0.508869	8.22406e-05	6.62 (2.12-33.41)
6q23.3	137603442	rs4896251	Intergenic	A/G	G	GWAS	153	126	32		0.305466		60	22	4		0.174419		0.000521619	0.000905615	0.137235	2.38 (1.39-4.14)
						Replication	95	91	19		0.314634		11	3	2		0.21875		0.322121	0.118197	0.653805	2.54 (0.78-9.66)
						Combined	248	217	51		0.309109		71	25	6		0.181373		0.000184444	8.30497e-05	0.261213	2.47 (1.54-4.04)
5q22.2	111890072	rs13154524	Intergenic	G/A	A	GWAS	140	138	36		0.334395		55	28	3		0.197674		0.000516802	0.00155226	0.0244112	2.04 (1.34-3.17)
						Replication	76	100	29		0.385366		6	10	0		0.3125		0.455426	1	0.138886	1.38 (0.61-3.35)
						Combined	216	238	65		0.354528		61	38	3		0.215686		8.9612e-05	0.00101322	0.0027922	2.00 (1.38-2.92)
11q23.3	120506771	rs12295498	GRIK4	C/T	C	GWAS	302	12	1		0.98		72	14	0		0.92		0.000625113	1	0.000294313	4.49 (1.87-10.89)
						Replication	193	12	0		0.97		13	3	0		0.91		0.0863683	1	0.0828425	3.68 (0.59-16.24)
						Combined	495	24	1		0.98		85	17	0		0.92		0.000185229	1	9.43016e-05	3.95 (1.91-7.98)
9q22.1	90648841	rs12683872	Intergenic	A/G	A	GWAS	207	94	14		0.806349		38	39	9		0.668605		0.000191941	0.0618861	0.000433861	2.06 (1.39-3.04)
						Replication	137	60	6		0.82266		9	7	0		0.78125		0.63181	1	0.411835	1.30 (0.46-3.24)
						Combined	344	154	20		0.812741		47	46	9		0.686275		9.84647e-05	0.0394883	0.000187387	1.98 (1.39-2.80)
1p31.3	63799525	rs12123368	Intergenic	G/A	A	GWAS	256	53	5		0.100318		81	4	0		0.0235294		0.000539651	0.00114771	0.589003	4.62 (1.68-17.75)
						Replication	166	36	3		0.102439		15	1	0		0.03125		0.346842	0.315683	1	3.53 (0.56-147.51)
						Combined	422	89	8		0.101156		96	5	0		0.0247525		0.000128153	0.000341467	0.365562	4.43 (1.80-14.11)
11p12	36478114	rs10836563	PRR5L	C/T	T	GWAS	106	156	53		0.415873		32	52	2		0.325581		0.0348139	0.608653	0.000150204	8.47 (2.15-73.14)
						Replication	90	85	30		0.353659		8	7	1		0.28125		0.448074	0.794849	0.705994	2.56 (0.37-111.77)
						Combined	196	241	83		0.391346		40	59	3		0.318627		0.0580721	0.82355	0.0001301	6.26 (2.00-31.59)
7p21.3	12444157	rs9639128	LOC105375154	G/A	G	GWAS	160	115	40		0.69		26	51	9		0.6		0.0278619	0.710872	0.000919582	2.38 (1.39-4.14)
						Replication	101	83	21		0.7		4	12	0		0.63		0.430064	0.374616	0.0720103	2.90 (0.84-12.75)
						Combined	261	198	61		0.69		30	63	9		0.6		0.0139919	0.493759	0.000130558	2.42 (1.50-3.97)
12q12	41133114	rs11836043	CNTN1	T/C	T	GWAS	311	4	0		0.993651		78	8	0		0.953488		0.000866079	1	0.000782293	7.92 (2.06-36.86)
						Replication	203	2	0		0.995122		15	1	0		0.96875		0.202274	1	0.202701	6.65 (0.11-134.68)
						Combined	514	6	0		0.994231		93	9	0		0.955882		0.000147659	1	0.000131182	8.25 (2.55-28.86)
11q21	93305819	rs2399690	Intergenic	A/G	A	GWAS	175	119	21		0.744444		30	48	8		0.627907		0.00302296	0.47973	0.000946767	2.33 (1.38-3.98)
						Replication	122	67	16		0.758537		7	7	2		0.65625		0.205854	0.625972	0.292803	1.88 (0.60-6.21)
						Combined	297	186	37		0.75		37	55	10		0.632353		0.000740353	0.410508	0.000132565	2.34 (1.48-3.74)
2q22.1	139497309	rs11680550	NXPH2	C/T	C	GWAS	219	87	9		0.833333		46	29	11		0.703488		0.000298683	0.000758701	0.00685894	2.11 (1.40-3.15)
						Replication	138	60	7		0.819512		7	9	0		0.71875		0.162417	1	0.0975064	1.77 (0.69-4.18)
						Combined	357	147	16		0.827885		53	38	11		0.705882		0.000132639	0.00178697	0.00191394	2.00 (1.40-2.85)
6q23.2	134666311	rs7749856	LOC105378009	A/G	A	GWAS	136	140	39		0.653968		18	51	17		0.505814		0.000517766	0.112498	0.00015568	2.86 (1.59-5.37)
						Replication	80	90	35		0.609756		4	10	2		0.5625		0.707623	1	0.300171	1.91 (0.56-8.43)
						Combined	216	230	74		0.636538		22	61	19		0.514706		0.00123265	0.287027	0.000134078	2.58 (1.54-4.49)
12q23.3	104839272	rs17035610	Intergenic	C/T	C	GWAS	259	51	4		0.906051		56	28	2		0.813953		0.00161247	0.613276	0.000939577	2.52 (1.42-4.41)
						Replication	160	43	2		0.885366		8	8	0		0.75		0.044872	1	0.0276718	3.53 (1.09-11.47)
						Combined	419	94	6		0.897881		64	36	2		0.803922		0.000320355	0.624038	0.000138979	2.48 (1.53-4.01)
6p21.33	31313101	rs9265882	Intergenic	T/C	T	GWAS	120	139	56		0.601587		15	49	22		0.459302		0.000946888	0.123894	0.000280078	2.91 (1.56-5.72)
						Replication	70	96	39		0.57561		3	10	3		0.5		0.460099	1	0.275021	2.24 (0.59-12.66)
						Combined	190	235	95		0.591346		18	59	25		0.465686		0.001127	0.169225	0.000142752	2.68 (1.54-4.90)
1p34.1	44578764	rs6682866	KLF17	A/C	A	GWAS	296	17	1		0.969745		70	15	1		0.901163		0.000521411	0.384198	0.000628021	3.51 (1.67-7.32)
						Replication	187	18	0		0.956098		12	4	0		0.875		0.0654989	1	0.0602294	3.10 (0.71-10.32)
						Combined	483	35	1		0.964355		82	19	1		0.897059		0.000168455	0.301745	0.000202893	3.10 (1.68-5.58)
12q23.2	103575787	rs10860950	C12orf42	C/T	C	GWAS	144	138	33		0.67619		20	53	13		0.540698		0.00118153	0.252404	0.000182201	2.77 (1.57-5.07)
						Replication	86	92	27		0.643902		5	10	1		0.625		0.849464	0.700056	0.443541	1.59 (0.49-6.04)
						Combined	230	230	60		0.663462		25	63	14		0.553922		0.00386987	0.506804	0.000173421	2.44 (1.48-4.13)
4p15.31	20780035	rs16869959	KCNIP4	T/C	C	GWAS	174	131	10		0.239683		65	19	2		0.133721		0.00241127	0.000752702	1	2.50 (1.43-4.53)
						Replication	116	81	8		0.236585		12	4	0		0.125		0.190583	0.192602	1	2.29 (0.67-10.09)
						Combined	290	212	18		0.238462		77	23	2		0.132353		0.000612456	0.000173421	0.757148	2.44 (1.48-4.13)
9q22.1	90630239	rs7864469	Intergenic	T/G	T	GWAS	209	93	13		0.811111		40	37	9		0.680233		0.000364708	0.0313368	0.0010591	2.02 (1.35-2.99)
						Replication	143	56	6		0.834146		10	6	0		0.8125		0.805266	1	0.57844	1.16 (0.38-3.03)
						Combined	352	149	19		0.820192		50	43	9		0.70098		0.000174639	0.0330249	0.000424896	1.94 (1.36-2.76)
6p22.3	20210374	rs1327665	MBOAT1	C/A	C	GWAS	151	134	29		0.694268		23	52	10		0.576471		0.0043959	0.536507	0.000528455	2.49 (1.44-4.44)
						Replication	86	98	21		0.658537		3	12	1		0.5625		0.335309	1	0.109798	3.12 (0.82-17.57)
						Combined	237	232	50		0.680154		26	64	11		0.574257		0.00435533	0.715033	0.000175568	2.42 (1.48-4.08)
13q31.3	92240153	rs10492618	GPC5	C/T	C	GWAS	268	45	2		0.922222		59	24	3		0.825581		0.000429977	0.0684112	0.00089663	2.50 (1.48-4.19)
						Replication	168	35	2		0.904878		11	4	1		0.8125		0.121087	0.202701	0.19513	2.19 (0.69-5.90)
						Combined	436	80	4		0.915385		70	28	4		0.823529		0.000176486	0.0281111	0.000725227	2.32 (1.47-3.58)
6q16.1	97764445	rs10499010	LOC101927314	A/G	A	GWAS	239	69	6		0.871019		51	28	7		0.755814		0.000473773	0.00940909	0.00267833	2.18 (1.40-3.37)
						Replication	150	50	5		0.853659		9	6	1		0.75		0.127481	0.366381	0.156713	1.94 (0.72-4.73)
						Combined	389	119	11		0.864162		60	34	8		0.754902		0.000178534	0.00634749	0.00152504	2.06 (1.40-3.01)
5q22.2	111888948	rs4574588	Intergenic	T/C	C	GWAS	171	119	25		0.268254		63	21	2		0.145349		0.000624576	0.00192203	0.0868322	2.15 (1.35-3.56)
						Replication	100	82	23		0.312195		8	8	0		0.25		0.553723	1	0.384904	1.36 (0.57-3.60)
						Combined	271	201	48		0.285577		71	29	2		0.161765		0.000180148	0.00109568	0.00921617	2.07 (1.38-3.18)
16p12.1	25968462	rs11642490	HS3ST4	C/T	C	GWAS	96	154	65		0.549206		21	31	34		0.424419		0.0044134	0.000621414	0.288117	2.51 (1.45-4.31)
						Replication	56	117	32		0.558537		4	9	3		0.53125		0.85395	0.723719	1	1.25 (0.22-4.91)
						Combined	152	271	97		0.552885		25	40	37		0.441176		0.00355849	0.000187125	0.400894	2.48 (1.52-4.02)
7q31.2	114918175	rs7786940	Intergenic	T/C	T	GWAS	92	182	41		0.580952		16	44	26		0.44186		0.00134825	0.000479263	0.0550305	2.89 (1.57-5.26)
						Replication	60	108	37		0.556098		3	7	6		0.40625		0.139348	0.092866	0.566069	2.71 (0.76-8.85)
						Combined	152	290	78		0.571154		19	51	32		0.436275		0.000513833	0.000187744	0.0291213	2.59 (1.54-4.29)
14q22.3	58069052	rs1535573	SLC35F4	A/G	G	GWAS	133	142	40		0.352381		55	23	8		0.226744		0.00176133	0.000391424	0.45747	2.42 (1.44-4.12)
						Replication	87	94	24		0.346341		9	5	2		0.28125		0.562891	0.305871	1	1.74 (0.55-5.73)
						Combined	220	236	64		0.35		64	28	10		0.235294		0.00146306	0.000198175	0.615542	2.29 (1.45-3.66)
14q22.3	58073401	rs1745690	SLC35F4	A/G	G	GWAS	133	142	40		0.352381		55	23	8		0.226744		0.00176133	0.000391424	0.45747	2.42 (1.44-4.12)
						Replication	87	94	24		0.346341		9	5	2		0.28125		0.562891	0.305871	1	1.74 (0.55-5.73)
						Combined	220	236	64		0.35		64	28	10		0.235294		0.00146306	0.000198175	0.615542	2.29 (1.45-3.66)
8q22.1	97201453	rs2440212	Intergenic	A/G	G	GWAS	143	133	39		0.334921		41	44	1		0.267442		0.0976712	0.71589	0.000848107	11.97 (1.96-491.05)
						Replication	100	83	22		0.309756		9	7	0		0.21875		0.323916	0.611947	0.378911	Inf (0.43-Inf)
						Combined	243	216	61		0.325		50	51	1		0.259804		0.0698647	0.744997	0.000201816	13.40 (2.26-542.79)
8q22.1	97206319	rs2440213	Intergenic	A/G	G	GWAS	143	133	39		0.334921		40	45	1		0.273256		0.140684	0.902995	0.000848107	11.97 (1.96-491.05)
						Replication	100	83	22		0.309756		9	7	0		0.21875		0.323916	0.611947	0.378911	Inf (0.43-Inf)
						Combined	243	216	61		0.325		49	52	1		0.264706		0.0992722	0.828835	0.000201816	13.40 (2.26-542.79)
8q22.1	97207924	rs2514549	Intergenic	T/C	C	GWAS	143	133	39		0.334921		40	45	1		0.273256		0.140684	0.902995	0.000848107	11.97 (1.96-491.05)
						Replication	100	83	22		0.309756		9	7	0		0.21875		0.323916	0.611947	0.378911	Inf (0.43-Inf)
						Combined	243	216	61		0.325		49	52	1		0.264706		0.0992722	0.828835	0.000201816	13.40 (2.26-542.79)
8q22.1	97191039	rs2514542	Intergenic	T/C	C	GWAS	143	133	38		0.332803		41	44	1		0.267442		0.116439	0.807196	0.000853896	11.67 (1.91-478.79)
						Replication	100	83	22		0.309756		9	7	0		0.21875		0.323916	0.611947	0.378911	Inf (0.43-Inf)
						Combined	243	216	60		0.323699		50	51	1		0.259804		0.0827231	0.745041	0.000202596	13.18 (2.22-534.06)
9q22.1	90621460	rs7043672	Intergenic	G/A	G	GWAS	209	94	11		0.815287		40	36	9		0.682353		0.000305066	0.0201387	0.00150122	2.05 (1.37-3.05)
						Replication	143	56	6		0.834146		10	6	0		0.8125		0.805266	1	0.57844	1.16 (0.38-3.03)
						Combined	352	150	17		0.822736		50	42	9		0.70297		0.000212742	0.0245638	0.000595667	1.96 (1.37-2.79)
20p13	4341433	rs12625433	Intergenic	G/A	G	GWAS	204	92	19		0.793651		38	39	9		0.668605		0.0010622	0.156643	0.000741171	2.32 (1.39-3.88)
						Replication	134	60	11		0.8		8	8	0		0.75		0.496673	1	0.279054	1.88 (0.59-6.02)
						Combined	338	152	30		0.796154		46	47	9		0.681373		0.000616552	0.262736	0.000217888	2.26 (1.44-3.56)
14q21.3	49361167	rs11157656	LOC105378178	C/T	C	GWAS	123	153	37		0.63738		17	52	17		0.5		0.00145726	0.0737356	0.000834669	1.76 (1.23-2.51)
						Replication	81	92	32		0.619512		4	6	6		0.4375		0.0588916	0.0372253	0.296754	2.09 (0.95-4.68)
						Combined	204	245	69		0.630309		21	58	23		0.490196		0.00022069	0.0218261	0.000281562	1.77 (1.30-2.43)
4q21.23	84456409	rs9992543	Intergenic	C/T	C	GWAS	149	140	26		0.695238		32	35	19		0.575581		0.00446957	0.000809574	0.112049	3.14 (1.55-6.30)
						Replication	101	83	21		0.695122		5	7	4		0.53125		0.0741867	0.0905611	0.199451	2.90 (0.63-10.76)
						Combined	250	223	47		0.695192		37	42	23		0.568627		0.000577431	0.000254399	0.0301632	2.92 (1.60-5.23)
14q23.2	64562195	rs10136633	SYNE2	C/A	A	GWAS	244	65	5		0.119427		81	4	1		0.0348837		0.00054283	0.000269979	1	4.63 (1.80-15.23)
						Replication	155	49	1		0.12439		13	3	0		0.09375		0.783363	0.767079	1	1.40 (0.36-7.94)
						Combined	399	114	6		0.121387		94	7	1		0.0441176		0.000777338	0.000255371	1	3.53 (1.65-8.65)
9q31.2	109998563	rs2808363	Intergenic	G/A	G	GWAS	191	105	19		0.773016		33	46	6		0.658824		0.00281798	0.800394	0.000516155	2.42 (1.45-4.10)
						Replication	128	65	11		0.786765		9	6	1		0.75		0.655901	0.605647	0.603018	1.31 (0.40-4.13)
						Combined	319	170	30		0.77842		42	52	7		0.673267		0.00207492	0.646799	0.000259083	2.24 (1.42-3.55)
16p12.1	24247031	rs198174	Intergenic	A/G	A	GWAS	100	164	51		0.577778		16	42	28		0.430233		0.000725903	0.00122873	0.0220241	1.81 (1.27-2.59)
						Replication	62	106	37		0.560976		4	6	6		0.4375		0.198738	0.092866	0.782305	1.64 (0.75-3.67)
						Combined	162	270	88		0.571154		20	48	34		0.431373		0.000288274	0.000328158	0.0232599	1.75 (1.28-2.41)
7q31.1	109594847	rs3114833	Intergenic	A/G	G	GWAS	90	158	66		0.461783		36	45	5		0.319767		0.000933829	0.0255613	0.000685211	4.30 (1.67-14.15)
						Replication	70	89	46		0.441463		3	11	2		0.46875		0.85395	0.275021	0.532155	2.02 (0.44-18.96)
						Combined	160	247	112		0.453757		39	56	7		0.343137		0.00419009	0.163574	0.000289119	3.73 (1.68-9.80)
9q22.1	90664979	rs7871733	Intergenic	T/C	T	GWAS	222	83	10		0.836508		42	39	5		0.715116		0.000608676	0.331269	0.000293832	2.49 (1.49-4.19)
						Replication	147	53	5		0.846341		11	5	0		0.84375		1	1	0.778975	1.15 (0.30-3.79)
						Combined	369	136	15		0.840385		53	44	5		0.735294		0.000596606	0.35082	0.000292602	2.26 (1.43-3.56)
1q21.3	154296076	rs1194610	AQP10	T/C	T	GWAS	228	78	9		0.847619		44	38	4		0.732558		0.000704416	0.489032	0.00038551	2.50 (1.48-4.20)
						Replication	141	60	4		0.834146		9	7	0		0.78125		0.462743	1	0.40407	1.71 (0.52-5.42)
						Combined	369	138	13		0.842308		53	45	4		0.740196		0.000807429	0.501334	0.000292602	2.26 (1.43-3.56)
14q23.3	66536636	rs4144665	Intergenic	G/A	G	GWAS	164	131	19		0.730892		45	25	16		0.668605		0.125934	0.000819925	1	3.53 (1.61-7.68)
						Replication	117	73	15		0.74878		9	4	3		0.6875		0.527511	0.129494	1	2.90 (0.48-12.35)
						Combined	281	204	34		0.737958		54	29	19		0.671569		0.0584487	0.000297616	0.828875	3.26 (1.67-6.20)
10q22.2	77597792	rs11595613	LRMDA	A/G	A	GWAS	100	157	58		0.566667		11	54	21		0.44186		0.00432952	0.223044	0.000363442	3.16 (1.58-6.90)
						Replication	66	100	38		0.568627		4	8	4		0.5		0.464841	0.514967	0.781142	1.43 (0.41-6.33)
						Combined	166	257	96		0.567437		15	62	25		0.45098		0.0026436	0.17203	0.000317105	2.72 (1.51-5.23)
20q13.13	49465402	rs6020792	BCAS4	T/G	T	GWAS	173	120	22		0.739683		29	45	12		0.598837		0.000438603	0.0491933	0.000612428	1.90 (1.31-2.75)
						Replication	109	87	9		0.743902		7	8	1		0.6875		0.530649	0.536018	0.60486	1.32 (0.54-3.02)
						Combined	282	207	31		0.741346		36	53	13		0.612745		0.000318174	0.0201321	0.000506722	1.81 (1.30-2.51)
10q22.2	77554279	rs10160008	LRMDA	T/C	T	GWAS	99	154	60		0.5623		11	54	21		0.44186		0.00569967	0.291602	0.000364945	3.15 (1.57-6.87)
						Replication	66	102	37		0.570732		4	8	4		0.5		0.463179	0.505759	0.781036	1.42 (0.41-6.28)
						Combined	165	256	97		0.565637		15	62	25		0.45098		0.00338906	0.176043	0.000321458	2.71 (1.50-5.20)
3p14.1	69034315	rs9818973	EOGT	T/C	C	GWAS	160	120	31		0.292605		46	40	0		0.232558		0.125648	0.807567	0.000487349	Inf (2.36-Inf)
						Replication	77	102	26		0.37561		10	5	1		0.21875		0.0871654	0.0632895	0.699818	2.17 (0.31-95.17)
						Combined	237	222	57		0.325581		56	45	1		0.230392		0.00788768	0.104324	0.000325045	12.52 (2.10-507.85)
1q21.3	153560040	rs28857273	Intergenic	C/A	C	GWAS	226	80	7		0.84984		44	39	3		0.738372		0.000968778	0.454737	0.000392567	2.47 (1.47-4.16)
						Replication	154	48	3		0.868293		12	4	0		0.875		1	1	1	1.01 (0.23-3.51)
						Combined	380	128	10		0.857143		56	43	3		0.759804		0.00106784	0.457806	0.000336826	2.26 (1.42-3.57)
14q23.3	66558515	rs12588780	Intergenic	A/G	A	GWAS	162	133	19		0.727707		42	27	16		0.652941		0.0694404	0.000756108	0.806888	3.59 (1.63-7.79)
						Replication	111	78	16		0.731707		9	4	3		0.6875		0.679812	0.146895	1	2.71 (0.45-11.41)
						Combined	273	211	35		0.729287		51	31	19		0.658416		0.0491337	0.000338753	0.744345	3.20 (1.64-6.07)
13q33.1	101776309	rs17677956	NALCN	A/G	G	GWAS	122	143	50		0.385714		46	37	3		0.25		0.000885622	0.0188119	0.00186164	1.88 (1.27-2.83)
						Replication	71	100	34		0.409756		7	7	2		0.34375		0.57576	0.587872	1	1.32 (0.59-3.13)
						Combined	193	243	84		0.395192		53	44	5		0.264706		0.000363994	0.00567047	0.00179417	1.81 (1.29-2.59)
7p14.2	36210289	rs10230457	EEPD1	G/A	G	GWAS	256	53	6		0.896825		54	30	2		0.802326		0.00154489	0.682335	0.000717277	2.56 (1.47-4.45)
						Replication	151	47	7		0.85122		8	7	1		0.71875		0.0732289	0.457382	0.0779466	2.78 (0.86-8.97)
						Combined	407	100	13		0.878846		62	37	3		0.789216		0.00111843	0.73495	0.000374572	2.32 (1.44-3.72)
8q13.1	66663253	rs12542226	PDE7A MTFR1	G/A	G	GWAS	117	153	45		0.614286		15	52	19		0.476744		0.00162279	0.0960373	0.000448008	2.79 (1.50-5.49)
						Replication	84	96	25		0.643902		6	9	1		0.65625		1	0.700555	1	1.16 (0.36-4.03)
						Combined	201	249	70		0.625962		21	61	20		0.504902		0.00167163	0.122997	0.000426059	2.43 (1.43-4.27)
7p14.1	40866663	rs17688601	SUGCT	C/A	C	GWAS	308	7	0		0.988889		76	10	0		0.94186		0.000771828	1	0.000666131	5.75 (1.91-18.44)
						Replication	194	11	0		0.973171		13	3	0		0.90625		0.0726124	1	0.0693827	4.03 (0.64-18.10)
						Combined	502	18	0		0.982692		89	13	0		0.936275		0.000563777	1	0.000466462	4.06 (1.76-9.13)
10q22.2	77567728	rs7072973	LRMDA	T/C	T	GWAS	98	156	61		0.55873		11	54	21		0.44186		0.00745316	0.295537	0.000564038	3.07 (1.53-6.71)
						Replication	66	101	38		0.568293		4	8	4		0.5		0.465191	0.513468	0.781036	1.42 (0.41-6.28)
						Combined	164	257	99		0.5625		15	62	25		0.45098		0.004368	0.222694	0.000471289	2.67 (1.48-5.13)
3q22.3	137012388	rs9851969	Intergenic	C/T	T	GWAS	82	159	72		0.484026		40	30	16		0.360465		0.00431507	0.000528707	0.463273	2.44 (1.45-4.12)
						Replication	53	95	57		0.509756		5	9	2		0.40625		0.276427	0.768104	0.246964	1.30 (0.34-4.30)
						Combined	135	254	129		0.494208		45	39	18		0.367647		0.000959233	0.000479537	0.127278	2.24 (1.41-3.54)
2p22.2	36841425	rs4670571	Intergenic	T/C	C	GWAS	71	164	78		0.511182		35	32	17		0.392857		0.00702021	0.000791308	0.471435	2.43 (1.41-4.16)
						Replication	51	114	40		0.473171		6	8	2		0.375		0.358222	0.371629	0.742478	1.81 (0.51-5.81)
						Combined	122	278	118		0.496139		41	40	19		0.39		0.0067365	0.000482549	0.433614	2.25 (1.40-3.60)
4q35.2	188125082	rs6811993	LINC02374	T/C	T	GWAS	194	107	14		0.785714		38	37	11		0.656977		0.00085825	0.00952172	0.00454516	1.91 (1.30-2.80)
						Replication	115	81	9		0.758537		7	7	2		0.65625		0.205854	0.184183	0.435605	1.64 (0.69-3.71)
						Combined	309	188	23		0.775		45	44	13		0.656863		0.000491984	0.00378777	0.0060636	1.80 (1.28-2.51)
20p11.23	18512739	rs3818217	SEC23B	T/G	T	GWAS	155	135	25		0.706349		29	40	17		0.569767		0.000902507	0.0027425	0.0143168	1.81 (1.26-2.61)
						Replication	105	79	21		0.704878		6	8	2		0.625		0.423166	0.675709	0.312845	1.43 (0.62-3.19)
						Combined	260	214	46		0.705769		35	48	19		0.578431		0.000511803	0.00693189	0.00465067	1.75 (1.27-2.40)
2q22.1	138810921	rs12463785	LOC105373636	G/A	A	GWAS	169	108	38		0.292063		59	26	1		0.162791		0.000600973	0.0140899	0.000861677	2.12 (1.35-3.42)
						Replication	116	75	14		0.25122		11	5	0		0.15625		0.288345	0.435577	0.606059	1.81 (0.66-6.18)
						Combined	285	183	52		0.275962		70	31	1		0.161765		0.000597639	0.0116493	0.0008408	1.97 (1.32-3.03)
3p14.1	68365162	rs1155324	TAFA1 LOC107986019	A/G	A	GWAS	116	152	47		0.609524		26	33	27		0.494186		0.00689277	0.00089663	0.308939	2.60 (1.44-4.67)
						Replication	82	98	25		0.639024		6	8	2		0.625		0.851112	1	1	1.03 (0.11-4.91)
						Combined	198	250	72		0.621154		32	41	29		0.514706		0.00485171	0.000618768	0.2183	2.47 (1.44-4.15)
9q31.2	109991942	rs1519049	LOC107987110	A/G	A	GWAS	194	102	19		0.777778		35	44	7		0.662791		0.00268386	0.46418	0.000835818	2.33 (1.40-3.92)
						Replication	127	67	11		0.782927		9	6	1		0.75		0.659577	0.603872	0.790509	1.26 (0.38-3.99)
						Combined	321	169	30		0.779808		44	50	8		0.676471		0.00213945	0.495535	0.000619303	2.12 (1.35-3.35)
22q11.23	24463996	rs3788367	CABIN1	C/T	C	GWAS	196	103	16		0.785714		36	46	4		0.686047		0.00825639	1	0.000854519	2.28 (1.37-3.84)
						Replication	121	72	12		0.765854		7	9	0		0.71875		0.523257	1	0.295056	1.85 (0.59-6.08)
						Combined	317	175	28		0.777885		43	55	4		0.691176		0.00896936	0.805622	0.000624744	2.14 (1.36-3.38)
3p14.1	68364358	rs17047489	TAFA1 LOC107986019	T/C	T	GWAS	116	152	47		0.609524		26	33	27		0.494186		0.00689277	0.00089663	0.308939	2.60 (1.44-4.67)
						Replication	81	98	25		0.637255		6	8	2		0.625		1	1	1	1.02 (0.11-4.88)
						Combined	197	250	72		0.620424		32	41	29		0.514706		0.00605595	0.000627525	0.218874	2.46 (1.44-4.15)
8q22.2	99374659	rs4476980	Intergenic	C/T	T	GWAS	114	136	65		0.422222		31	50	5		0.348837		0.0959622	1	0.0006997	4.20 (1.63-13.83)
						Replication	86	78	41		0.390244		5	9	2		0.40625		0.853029	0.443541	0.74327	1.75 (0.38-16.44)
						Combined	200	214	106		0.409615		36	59	7		0.357843		0.184277	0.578324	0.000667693	3.47 (1.56-9.13)
2q35	216458974	rs4672775	LOC102724861	A/C	C	GWAS	97	149	69		0.455556		30	50	6		0.360465		0.0299243	0.513594	0.000982756	3.73 (1.55-10.92)
						Replication	83	85	37		0.387805		8	7	1		0.28125		0.261442	0.599087	0.317996	3.29 (0.48-142.70)
						Combined	180	234	106		0.428846		38	57	7		0.348039		0.0358292	0.650185	0.000667693	3.47 (1.56-9.13)
16q12.1	51599972	rs1391735	Intergenic	A/G	A	GWAS	296	19	0		0.969841		70	16	0		0.906977		0.00107035	1	0.000803176	3.55 (1.62-7.70)
						Replication	190	15	0		0.963415		14	2	0		0.9375		0.352639	1	0.353779	1.80 (0.18-9.10)
						Combined	486	34	0		0.967308		84	18	0		0.911765		0.000896339	1	0.00066977	3.06 (1.55-5.87)
2q31.1	172528095	rs979956	Intergenic	C/A	C	GWAS	216	88	11		0.825397		42	39	5		0.715116		0.0017487	0.351689	0.000933036	1.88 (1.24-2.82)
						Replication	137	61	7		0.817073		9	5	2		0.71875		0.167363	0.131301	0.417831	1.75 (0.68-4.11)
						Combined	353	149	18		0.822115		51	44	7		0.715686		0.000700934	0.160975	0.000920265	1.84 (1.28-2.62)
1p12	118760171	rs6667043	Intergenic	A/C	A	GWAS	229	74	12		0.844444		46	37	3		0.75		0.0064008	1	0.000992894	2.31 (1.37-3.89)
						Replication	156	45	4		0.870732		12	4	0		0.875		1	1	1	1.06 (0.24-3.71)
						Combined	385	119	16		0.854808		58	41	3		0.769608		0.00331173	1	0.000749355	2.16 (1.36-3.42)
1q24.3	170917638	rs1033481	MROH9	G/A	G	GWAS	77	175	60		0.527244		22	32	32		0.44186		0.0481781	0.000811938	0.888287	2.48 (1.42-4.31)
						Replication	65	95	45		0.54878		3	8	5		0.4375		0.269958	0.366777	0.401514	1.61 (0.42-5.36)
						Combined	142	270	105		0.535783		25	40	37		0.441176		0.0141831	0.000762303	0.625597	2.23 (1.37-3.60)
7q21.2	92653334	rs10488529	Intergenic	G/A	A	GWAS	207	101	7		0.18254		72	14	0		0.0813953		0.000974474	0.0013814	0.354046	2.52 (1.39-4.89)
						Replication	144	55	6		0.163415		13	3	0		0.09375		0.449724	0.567276	1	1.89 (0.56-9.95)
						Combined	351	156	13		0.175		85	17	0		0.0833333		0.000766729	0.00130631	0.141339	2.33 (1.37-4.19)
GWAS, genome-wide association study; SNP, single nucleotide polymorphism; RAF, risk allele frequency; CI, confidence interval; Inf, infimum.
a Based on GRCh37 genome assembly.
b Reference allele (GRCh37) was defined as allele 1.
c Odds ratios and confidence intervals were calculated for the genetic model with smallest P value in three genetic models.
